# Supplementary material
Source: Springer Nature journal article supplement (https://www.springermedizin.de/resource/supplementary/12969_2009_371_MOESM2_ESM.pdf/9592898)
Supplement: MOESM2 [file 9592898]

# Mucopolysaccharidosis I

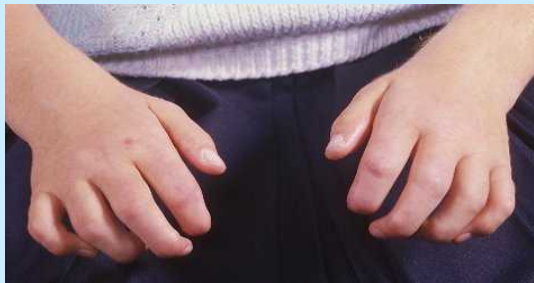

Photo: J. Edmond Wraith

# Juvenile Arthritis

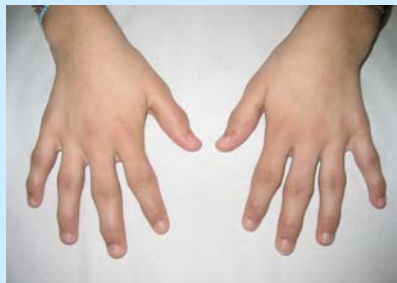

Photo: Rolando Cimaz

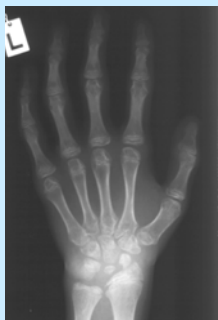

Photo: Bianca Link

**Attenuated**

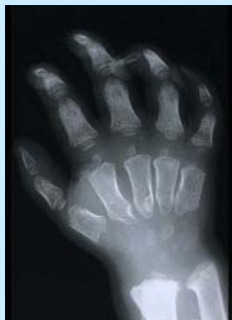

Photo: J. Edmond Wraith

**Severe**

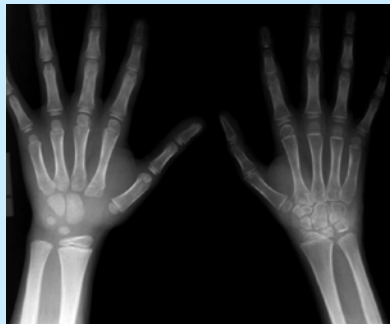

Photo: Rolando Cimaz
